# Supplementary material for: Clinical Outcomes of Dynamic Compression Bracing in Pediatric Patients with Pectus Carinatum: A Retrospective Study
Source: Research Square preprint supplement (doi:10.21203/rs.3.rs-7802455/v1), 2025-10-10
Supplement: Supplementary file 1 [file 9b041adf2f26403023c32014.docx]

**Table 1. Demographic and Initial Anthropometric Measurement Data**

| Variable | **Mean ± SD** | **Median** | **Min** | **Max** |
| --- | --- | --- | --- | --- |
| **Age (years)** | 13.1 ± 2.6 | 13.0 | 4 | 17 |
| **Height (cm)** | 152.3 ± 12.1 | 153.0 | 120 | 180 |
| **Weight (kg)** | 47.5 ± 9.8 | 47.0 | 30 | 70 |
| **BMI (kg/m²)** | 18.3 ± 4.2 | 17.2 | 13.7 | 38.7 |
| **PCP (cm)** | 18.0 ± 4.0 | 18.0 | 2.0 | 27.0 |
| **Initial Pressure (psi)** | 49.6 ± 22.2 | 55.0 | 3.0 | 94.0 |
| **First Correction Pressure (psi)** | 17.9 ± 20.2 | 6.0 | 0.0 | 63.0 |

SD = Standard Deviation; BMI = Body Mass Index; PCP = Protrusion Chest Point.
