# Supplementary material for: Clinical Outcomes of Dynamic Compression Bracing in Pediatric Patients with Pectus Carinatum: A Retrospective Study
Source: Research Square preprint supplement (doi:10.21203/rs.3.rs-7802455/v1), 2025-10-10
Supplement: Supplementary file 2 [file b401677f51abbc9da5b4e3c9.docx]

**Table 2. Complaints, Clinical Findings, and Responses after Orthosis**

| Symptom/Response | Present n (%) | Absent n (%) |
| --- | --- | --- |
| **Cosmetic concern** | 52 (100.0%) | 0 (0%) |
| **Pain complaint** | 6 (11.5%) | 46 (88.5%) |
| **Dyspnea complaint** | 5 (9.6%) | 47 (90.4%) |
| **Family history** | 15 (28.8%) | 37 (71.2%) |
| **Postural disorder** | 19 (36.5%) | 33 (63.5%) |
| **Chest pain** | 5 (9.6%) | 47 (90.4%) |
| **Back pain** | 5 (9.6%) | 47 (90.4%) |
| **Dyspnea at rest** | 1 (1.9%) | 51 (98.1%) |
| **Dyspnea on exertion** | 6 (11.5%) | 46 (88.5%) |
| **Dizziness on exertion** | 4 (7.7%) | 48 (92.3%) |
| **Symptoms prior to orthosis in PC** | 10 (19.2%) | 42 (80.8%) |
| **Somatic response to orthosis 1** | 5 (9.6%) | 47 (90.4%) |
| **Psychosocial response to orthosis 1** | 3 (5.8%) | 49 (94.2%) |
| **Somatic response to orthosis 2** | 0 (0%) | 52 (100.0%) |
| **Psychosocial response to orthosis 2** | 0 (0%) | 52 (100.0%) |

n = Number of patients; % = Percentage.
