# Supplementary material for: Clinical Outcomes of Dynamic Compression Bracing in Pediatric Patients with Pectus Carinatum: A Retrospective Study
Source: Research Square preprint supplement (doi:10.21203/rs.3.rs-7802455/v1), 2025-10-10
Supplement: Supplementary file 3 [file cf28452abf55380bcfdb9962.docx]

**Table 3. Logistic Regression Analysis of Factors Predicting Treatment Success**

| Variable | **OR** | **95% CI** | **p-value** |
| --- | --- | --- | --- |
| **Maternal education level** | 1.25 | 1.01 – 1.53 | 0.041* |
| **Paternal education level** | 1.08 | 0.93 – 1.24 | 0.290 |
| **Age (years)** | 0.746 | 0.515 – 1.080 | 0.121 |
| **Sex (male=1)** | 0.172 | 0.001 – 20.588 | 0.471 |
| **BMI** | 1.179 | 0.981 – 1.416 | 0.080 |

OR = Odds Ratio; CI = Confidence Interval; BMI = Body Mass Index.
